# Supplementary material for: Depicting the Profile of METTL3-Mediated lncRNA m6A Modification Variants and Identified SNHG7 as a Prognostic Indicator of MNNG-Induced Gastric Cancer
Source: MDPI journal article supplement (doi:10.3390/toxics11110944), 2023-11-20
Supplement: s1 [file s1]

**Supplementary Table 1 Clinical features of GC patients**

| Clinical Features | Group   | Case (N=40) |
|-------------------|---------|-------------|
| Gender            | Female  | 4           |
|                   | Male    | 36          |
| Age               | ≤65     | 33          |
|                   | > 65    | 7           |
| Tumor Grade       | G1      | 5           |
|                   | G2      | 6           |
|                   | G3      | 7           |
|                   | unknown | 22          |
| Serum             | CEA     | 18.28±54.87 |
| bio-feature       |         |             |
|                   | CA199   | 22.07±56.73 |

**Supplementary 2 Primer sequences of ShMETT3 and ShNC**

| RNAs                    | Primer sequences (5' to 3')                                       |
|-------------------------|-------------------------------------------------------------------|
| ShMETTL3 Top strand:    | GATCCGCAAGTATGTTCACTATGAAATTCAAGAGATTTCATAGTGAACATACTTGCTTTTTTG   |
| ShMETTL3 Bottom strand: | AATTCAAAAAAGCAAGTATGTTCACTATGAAATCTCTTGAATTCATAGTGAACATACTTGCG    |
| ShNC Top strand:        | GATCCGTTCTCCGAACGTGTCACGTAATTCAAGAGATTACGTGACACGTTCCGGAGAATTTTTTC |
| ShNC Bottom strand:     | AATTGAAAAAATTCTCCGAACGTGTCACGTAATCTCTTGAATTACGTGACACGTTCCGGAGAACG |

**Supplementary Table 3 MeRIP-seq Q30 controlled quality control results of all reads.**

| Sample                   | Raw Reads  | Clean Reads | Clean<br>Ratio | Mapped<br>Reads | Mapped<br>Ratio | Q30    |
|--------------------------|------------|-------------|----------------|-----------------|-----------------|--------|
| 40-MC ShMETTL3 1. IP     | 84,594,658 | 84,590,842  | 99.99%         | 77,568,157      | 91.70%          | 87.30% |
| 40-MC ShMETTL3 2. IP     | 83,473,990 | 83,469,782  | 99.99%         | 75,685,449      | 90.67%          | 89.00% |
| MC-40 ShNC1.IP           | 84,622,750 | 84,617,590  | 99.99%         | 77,768,560      | 91.91%          | 89.03% |
| MC-40 ShNC2.IP           | 83,918,590 | 83,914,050  | 99.99%         | 77,022,239      | 91.79%          | 87.63% |
| 40-MC ShMETTL3 1. Input  | 85,104,868 | 85,104,518  | 99.99%         | 78,070,702      | 91.74%          | 86.96% |
| 40-MC ShMETTL3 2. Input  | 67,134,618 | 67,134,336  | 99.99%         | 61,766,319      | 92.00%          | 85.64% |
| MC-40 ShNC1. Input       | 98,415,540 | 98,415,234  | 99.99%         | 90,334,431      | 91.79%          | 86.90% |
| MC-40 ShNC2. Input       | 73,437,368 | 73,436,978  | 99.99%         | 66,683,558      | 90.80%          | 85.28% |
| HGC-27 ShMETTL3 1. IP    | 83,224,296 | 83,085,150  | 99.83%         | 64,791,934      | 77.98%          | 89.64% |
| HGC-27 ShMETTL3 2. IP    | 68,345,412 | 68,164,614  | 99.74%         | 50,991,734      | 74.81%          | 90.64% |
| HGC-27 ShNC1.IP          | 63,956,998 | 63,888,662  | 99.89%         | 51,001,194      | 79.83%          | 88.41% |
| HGC-27 ShNC2.IP          | 70,445,272 | 70,363,832  | 99.88%         | 55,983,475      | 79.56%          | 90.26% |
| HGC-27 ShMETTL3 1. Input | 65,239,038 | 65,237,436  | 99.99%         | 58,578,740      | 89.79%          | 87.25% |

|                          |            |            |        |            |        |        |
|--------------------------|------------|------------|--------|------------|--------|--------|
| HGC-27 ShMETTL3 2. Input | 61,128,492 | 61,126,958 | 99.99% | 54,526,522 | 89.20% | 90.49% |
| HGC-27 ShNC1. Input      | 68,304,326 | 68,303,244 | 99.99% | 60,745,894 | 88.94% | 89.85% |
| HGC-27 ShNC2. Input      | 66,587,438 | 66,586,314 | 99.99% | 59,215,526 | 88.93% | 87.45% |

**Supplementary Table 4 MC-40 knockdown METTL3 (Sh-METTL3) and control cell group (Sh-NC) differential m6A Peak association analysis (top 20 m6A up-regulated, down-regulated)**

| Bed format information of differentially methylated RNA sites |           |           |                      |             | Annotation      |                     | Comparison information |         |       |            |
|---------------------------------------------------------------|-----------|-----------|----------------------|-------------|-----------------|---------------------|------------------------|---------|-------|------------|
| Chrom                                                         | Tx-Start  | Tx-End    | Peak-ID              | Score       | Transcript id   | Gene Name           | Fold change            | P-value | FDR   | Regulation |
| chr9                                                          | 42712721  | 42712860  | diffreps_peak_890064 | 8.580353403 | uc004acm.3      | <i>CBWD5</i>        | 511.3                  | <0.01   | <0.01 | up         |
| chr19                                                         | 5714913   | 5714940   | diffreps_peak_434683 | 8.405763605 | ENST00000590728 | <i>LONPI</i>        | 382.1                  | <0.01   | <0.01 | up         |
| chr5                                                          | 77417545  | 77417697  | diffreps_peak_718611 | 8.455305125 | ENST00000517561 | <i>AP3BI</i>        | 341.6                  | <0.01   | <0.01 | up         |
| chr7                                                          | 27244741  | 27245360  | diffreps_peak_802411 | 8.525397346 | NR_037843       | <i>HOTTIP</i>       | 331.4                  | <0.01   | <0.01 | up         |
| chr2                                                          | 231914041 | 231914434 | diffreps_peak_537594 | 8.471231696 | ENST00000463834 | <i>C2orf72</i>      | 236.4                  | <0.01   | <0.01 | up         |
| chr1                                                          | 119605476 | 119605820 | diffreps_peak_53361  | 8.464151809 | NR_126447       | <i>WARS2-IT1</i>    | 216.4                  | <0.01   | <0.01 | up         |
| chr11                                                         | 64793581  | 64793987  | diffreps_peak_156987 | 8.383371263 | ENST00000605239 | <i>AP000436.4</i>   | 201.6                  | <0.01   | <0.01 | up         |
| chr10                                                         | 95434121  | 95434400  | diffreps_peak_120454 | 8.268578543 | ENST00000460752 | <i>FRA10AC1</i>     | 186.5                  | <0.01   | <0.01 | up         |
| chr1                                                          | 100133621 | 100134120 | diffreps_peak_47247  | 7.920845368 | ENST00000605613 | <i>PALMD</i>        | 171.5                  | <0.01   | <0.01 | up         |
| chr10                                                         | 988419    | 988683    | diffreps_peak_96189  | 7.578935618 | NR_120629       | <i>LOC101927762</i> | 161.4                  | <0.01   | <0.01 | up         |
| chr6                                                          | 159639328 | 159639400 | diffreps_peak_790884 | 7.948831058 | ENST00000480856 | <i>FNDCl</i>        | 161.1                  | <0.01   | <0.01 | up         |
| chr17                                                         | 5151141   | 5151364   | diffreps_peak_362384 | 7.374488841 | ENST00000573772 | <i>RP11-333E1.1</i> | 156.5                  | <0.01   | <0.01 | up         |
| chr8                                                          | 103899201 | 103899375 | diffreps_peak_869414 | 7.377189108 | ENST00000517581 | <i>AZIN1</i>        | 156.4                  | <0.01   | <0.01 | up         |
| chr7                                                          | 43967661  | 43967710  | diffreps_peak_807284 | 7.190614824 | ENST00000440899 | <i>UBE2D4</i>       | 151.3                  | <0.01   | <0.01 | up         |
| chr4                                                          | 135248221 | 135248660 | diffreps_peak_689186 | 6.96103457  | ENST00000508165 | <i>PESIP1</i>       | 146.4                  | <0.01   | <0.01 | up         |

|       |           |           |                      |             |                 |                     |        |       |       |      |
|-------|-----------|-----------|----------------------|-------------|-----------------|---------------------|--------|-------|-------|------|
| chr7  | 127938261 | 127938540 | diffreps_peak_834685 | 6.997274805 | NR_046216       | <i>MGC27345</i>     | 146.2  | <0.01 | <0.01 | up   |
| chr6  | 3179837   | 3179940   | diffreps_peak_748278 | 7.757328689 | ENST00000404155 | <i>TUBB2BP1</i>     | 143.2  | <0.01 | <0.01 | up   |
| chr9  | 138076981 | 138077420 | diffreps_peak_921113 | 6.736270467 | NR_046107       | <i>LOC401557</i>    | 141.4  | <0.01 | <0.01 | up   |
| chr15 | 21224716  | 21224820  | diffreps_peak_278524 | 6.736270467 | ENST00000561158 | <i>KIAA0125P2</i>   | 141.4  | <0.01 | <0.01 | up   |
| chr19 | 28192398  | 28192460  | diffreps_peak_450600 | 6.751321321 | ENST00000588027 | <i>LINC00662</i>    | 141.3  | <0.01 | <0.01 | up   |
| chr14 | 60865741  | 60866067  | diffreps_peak_259534 | 8.351724527 | ENST00000555315 | <i>GNRHR2P1</i>     | 1178.8 | <0.01 | <0.01 | down |
| chr11 | 61909081  | 61909217  | diffreps_peak_154168 | 8.335201539 | ENST00000528375 | <i>INCENP</i>       | 372.1  | <0.01 | <0.01 | down |
| chr22 | 50172801  | 50173958  | diffreps_peak_604233 | 8.732471971 | uc011ari.1      | <i>LOC90834</i>     | 260.2  | <0.01 | <0.01 | down |
| chr19 | 640821    | 641460    | diffreps_peak_427949 | 9.130349886 | ENST00000591390 | <i>FGF22</i>        | 229.6  | <0.01 | <0.01 | down |
| chr12 | 53699479  | 53699560  | diffreps_peak_200770 | 8.305267111 | ENST00000550199 | <i>C12orf10</i>     | 178.3  | <0.01 | <0.01 | down |
| chr5  | 180629587 | 180629940 | diffreps_peak_746599 | 7.749912175 | ENST00000502812 | <i>CTC-338M12.6</i> | 175.5  | <0.01 | <0.01 | down |
| chr12 | 111081160 | 111081540 | diffreps_peak_217398 | 7.55458863  | ENST00000460357 | <i>TCTNI</i>        | 166.7  | <0.01 | <0.01 | down |
| chr19 | 65661     | 66460     | diffreps_peak_427482 | 9.855266778 | ENST00000606872 | <i>WASH5P</i>       | 164.9  | <0.01 | <0.01 | down |
| chr20 | 34164088  | 34164205  | diffreps_peak_556406 | 11.62527444 | NR_119376       | <i>FER1L4</i>       | 163.3  | <0.01 | <0.01 | down |
| chr14 | 73730161  | 73730490  | diffreps_peak_265127 | 7.306160124 | ENST00000555700 | <i>PAPLN</i>        | 161.1  | <0.01 | <0.01 | down |
| chr7  | 134132401 | 134132640 | diffreps_peak_837938 | 7.722035668 | ENST00000434222 | <i>AKR1B1</i>       | 159.3  | <0.01 | <0.01 | down |
| chr17 | 61917461  | 61917644  | diffreps_peak_395525 | 7.508511186 | ENST00000581353 | <i>RN7SL805P</i>    | 159    | <0.01 | <0.01 | down |
| chr2  | 25472486  | 25472572  | diffreps_peak_482757 | 7.317150923 | ENST00000470983 | <i>DNMT3A</i>       | 158.3  | <0.01 | <0.01 | down |
| chr16 | 28711861  | 28712221  | diffreps_peak_331423 | 6.948060532 | ENST00000564603 | <i>CDC37P1</i>      | 152.1  | <0.01 | <0.01 | down |
| chr1  | 31198566  | 31198898  | diffreps_peak_21151  | 6.462661971 | ENST00000443076 | <i>MATN1-AS1</i>    | 139    | <0.01 | <0.01 | down |
| chr22 | 24826101  | 24826344  | diffreps_peak_588785 | 6.420496072 | NR_028484       | <i>ADORA2A-AS1</i>  | 138.7  | <0.01 | <0.01 | down |
| chr2  | 217082581 | 217082900 | diffreps_peak_532769 | 8.13078575  | NR_037701       | <i>PKI55</i>        | 136.5  | <0.01 | <0.01 | down |
| chr5  | 150414056 | 150414060 | diffreps_peak_737385 | 7.165491001 | ENST00000517329 | <i>TNIP1</i>        | 135.6  | <0.01 | <0.01 | down |
| chr1  | 241587591 | 241587849 | diffreps_peak_92008  | 6.333892394 | ENST00000444330 | <i>RP11-527D7.1</i> | 134.6  | <0.01 | <0.01 | down |
| chr9  | 90583441  | 90584000  | diffreps_peak_897054 | 6.250822109 | ENST00000603475 | <i>CDK20</i>        | 133.4  | <0.01 | <0.01 | down |

Differentially methylated RNA sites for: Case vs Control; Fold change cut-off: 2; P-value cut-off: 0.01; FDR: the corrected p-value between two groups; Regulation: up or down in test group; Transcript id: the unique

identifier describing the predicted lncRNA assigned by stringtie; Gene Name: the gene id assigned by stringtie

**Supplementary Table 5 HGC-27 knockdown METTL3 (Sh-METTL3) and control cell group (Sh-NC) differential m6A Peak association analysis (top 20 m6A up-regulated, down-regulated)**

| Bed format information of differentially methylated RNA sites |           |           |                      |            | Annotation      |                      | Comparison information |         |       |            |
|---------------------------------------------------------------|-----------|-----------|----------------------|------------|-----------------|----------------------|------------------------|---------|-------|------------|
| Chrom                                                         | Tx-Start  | Tx-End    | Peak-ID              | Score      | Transcript id   | Gene Name            | Fold change            | P-value | FDR   | Regulation |
| chr5                                                          | 823503    | 823800    | diffreps_peak_354788 | 4.56833901 | uc010itc.3      | <i>ZDHHC11</i>       | 94.8                   | <0.01   | <0.01 | up         |
| chr11                                                         | 69866988  | 69867165  | diffreps_peak_79472  | 5.41053416 | ENST00000528507 | <i>RP11-626H12.2</i> | 91.2                   | <0.01   | <0.01 | up         |
| chr1                                                          | 228482721 | 228482842 | diffreps_peak_40232  | 4.53073455 | ENST00000494839 | <i>OBSCN</i>         | 88.6                   | <0.01   | <0.01 | up         |
| chr5                                                          | 59817681  | 59818280  | diffreps_peak_364503 | 4.46045373 | NR_028509       | <i>PART1</i>         | 85                     | <0.01   | <0.01 | up         |
| chr22                                                         | 27282871  | 27283220  | diffreps_peak_283566 | 3.94298158 | ENST00000422915 | <i>RP1-40G4P.1</i>   | 79.9                   | <0.01   | <0.01 | up         |
| chr3                                                          | 49823541  | 49823632  | diffreps_peak_297612 | 4.53825626 | ENST00000498149 | <i>IP6K1</i>         | 76.3                   | <0.01   | <0.01 | up         |
| chr7                                                          | 143097918 | 143098220 | diffreps_peak_443082 | 4.53825626 | ENST00000497891 | <i>EPHA1</i>         | 76.3                   | <0.01   | <0.01 | up         |
| chr5                                                          | 156533637 | 156534080 | diffreps_peak_383198 | 3.46633137 | ENST00000521665 | <i>HAVCR2</i>        | 71.2                   | <0.01   | <0.01 | up         |
| chr1                                                          | 156426144 | 156426369 | diffreps_peak_28036  | 3.55861964 | ENST00000452465 | <i>RP11-98G7.1</i>   | 71                     | <0.01   | <0.05 | up         |
| chr9                                                          | 115873689 | 115873957 | diffreps_peak_489373 | 3.32546273 | NR_024376       | <i>FAM225B</i>       | 67.7                   | <0.01   | <0.05 | up         |
| chr9                                                          | 141093587 | 141093775 | diffreps_peak_495149 | 3.95028224 | ENST00000428088 | <i>RP11-885N19.6</i> | 67.5                   | <0.01   | <0.01 | up         |
| chr6                                                          | 133421201 | 133421323 | diffreps_peak_411528 | 3.88579957 | NR_026969       | <i>LINC00326</i>     | 66.6                   | <0.01   | <0.01 | up         |
| chrX                                                          | 25911480  | 25911580  | diffreps_peak_499293 | 3.88579957 | ENST00000423914 | <i>RP11-86A5.1</i>   | 66.6                   | <0.01   | <0.01 | up         |
| chr17                                                         | 41895286  | 41895420  | diffreps_peak_186032 | 3.24273181 | ENST00000589375 | <i>MPP3</i>          | 65.9                   | <0.01   | <0.05 | up         |
| chr1                                                          | 94714968  | 94715048  | diffreps_peak_18410  | 3.10318774 | ENST00000413103 | <i>RP11-148B18.1</i> | 62.5                   | <0.01   | <0.05 | up         |
| chr7                                                          | 55742856  | 55743660  | diffreps_peak_427429 | 3.64470037 | ENST00000432235 | <i>RP11-310H4.6</i>  | 62.3                   | <0.01   | <0.05 | up         |
| chr15                                                         | 54239820  | 54239920  | diffreps_peak_150380 | 3.25270519 | ENST00000558866 | <i>RP11-643A5.2</i>  | 61.3                   | <0.01   | <0.05 | up         |
| chr3                                                          | 125804261 | 125804295 | diffreps_peak_310126 | 3.25270519 | ENST00000511301 | <i>RP11-124N2.1</i>  | 61.3                   | <0.01   | <0.05 | up         |
| chr1                                                          | 166056421 | 166056660 | diffreps_peak_29861  | 3.04738069 | ENST00000366136 | <i>RP11-375H19.2</i> | 60.6                   | <0.01   | <0.05 | up         |

|       |           |           |                      |             |                 |                      |       |        |       |      |
|-------|-----------|-----------|----------------------|-------------|-----------------|----------------------|-------|--------|-------|------|
| chr17 | 34242801  | 34243240  | diffreps_peak_184150 | 3.047380686 | ENST00000586565 | <i>LRRC37A9P</i>     | 60.6  | <0.01  | <0.05 | up   |
| chr7  | 66022261  | 66022349  | diffreps_peak_429008 | 6.34079187  | ENST00000325130 | <i>AC006001.1</i>    | 125.7 | <0.01  | <0.01 | down |
| chr10 | 131908967 | 131909081 | diffreps_peak_64320  | 7.27730939  | NR_034125       | <i>LINC00959</i>     | 117.1 | <0.01  | <0.01 | down |
| chr2  | 196860321 | 196860404 | diffreps_peak_255947 | 5.23658737  | ENST00000447755 | <i>AC104600.1</i>    | 104.7 | <0.01  | <0.01 | down |
| chr12 | 9280378   | 9281000   | diffreps_peak_92882  | 5.59841883  | ENST00000540749 | <i>RP11-436I9.5</i>  | 91.4  | <0.01  | <0.01 | down |
| chr4  | 9159204   | 9159285   | diffreps_peak_326053 | 4.80954578  | ENST00000509817 | <i>FAM86KP</i>       | 90.9  | <0.01  | <0.01 | down |
| chr21 | 45545541  | 45545780  | diffreps_peak_279409 | 4.57103674  | ENST00000471490 | <i>PWP2</i>          | 88.6  | <0.01  | <0.01 | down |
| chr4  | 146092061 | 146092320 | diffreps_peak_347936 | 4.57103674  | ENST00000504331 | <i>OTUD4</i>         | 88.6  | <0.01  | <0.01 | down |
| chr1  | 6294464   | 6294560   | diffreps_peak_1889   | 14.0000101  | ENST00000489498 | <i>ICMT</i>          | 88    | <0.01  | <0.01 | down |
| chr16 | 29086162  | 29086442  | diffreps_peak_166439 | 5.39821307  | NR_003369       | <i>RRN3P2</i>        | 87.1  | <0.01  | <0.01 | down |
| chr1  | 28210421  | 28210760  | diffreps_peak_6119   | 4.29509258  | ENST00000492877 | <i>THEMIS2</i>       | 84.3  | <0.001 | <0.01 | down |
| chr17 | 70078262  | 70078556  | diffreps_peak_191118 | 4.78368913  | ENST00000602213 | <i>SOX9-AS1</i>      | 81.3  | <0.01  | <0.01 | down |
| chr16 | 25027298  | 25027820  | diffreps_peak_165721 | 4.78368913  | ENST00000569988 | <i>RP11-266L9.1</i>  | 81.3  | <0.01  | <0.01 | down |
| chr1  | 168761568 | 168762100 | diffreps_peak_30248  | 4.78368913  | NR_024160       | <i>LINC00626</i>     | 81.3  | <0.01  | <0.01 | down |
| chr19 | 28221681  | 28221920  | diffreps_peak_214222 | 4.05042144  | uc002nrw.1      | <i>AK094188</i>      | 79.2  | <0.01  | <0.01 | down |
| chr5  | 79818001  | 79818220  | diffreps_peak_368503 | 4.05087713  | ENST00000509292 | <i>FAM151B</i>       | 79    | <0.01  | <0.01 | down |
| chr8  | 145305114 | 145305360 | diffreps_peak_469592 | 4.06947926  | ENST00000527552 | <i>MROH1</i>         | 78.5  | <0.01  | <0.01 | down |
| chr19 | 12875361  | 12875731  | diffreps_peak_210844 | 3.86416527  | ENST00000592259 | <i>HOOK2</i>         | 74.9  | <0.01  | <0.01 | down |
| chr12 | 88427541  | 88427814  | diffreps_peak_107634 | 3.8192279   | ENST00000546547 | <i>C12orf50</i>      | 73.7  | <0.01  | <0.01 | down |
| chr2  | 202897641 | 202898000 | diffreps_peak_257167 | 3.87304801  | ENST00000608741 | <i>RP11-107N15.1</i> | 73.2  | <0.01  | <0.01 | down |
| chr15 | 86839541  | 86840220  | diffreps_peak_157234 | 4.431926698 | ENST00000564487 | <i>AGBL1-AS1</i>     | 72.6  | <0.01  | <0.01 | down |

Differentially methylated RNA sites for: Case vs Control; Fold change cut-off: 2; P-value cut-off: 0.01; FDR: the corrected p-value between two groups; Regulation: up or down in test group; Transcript id: the unique identifier describing the predicted lncRNA assigned by stringtie; Gene Name: the gene id assigned by stringtie

Supplementary Table 6 66 hub-lncRNAs overlapped between METTL3 knockdown by different shRNAs in MC-40 and HGC-27 cells

| Annotations |                 |           |           |                      | MC-40 shMETTL3/shNC    |         |       | HGC-27 shMETTL3/ shNC  |         |       |
|-------------|-----------------|-----------|-----------|----------------------|------------------------|---------|-------|------------------------|---------|-------|
|             |                 |           |           |                      | Comparison information |         |       | Comparison information |         |       |
| Gene Name   | Transcript id   | tx-Start  | tx-End    | Peak-ID              | Fold change            | P-value | FDR   | Fold change            | P-value | FDR   |
| AC025165.8  | ENST00000356672 | 58011781  | 58011848  | diffreps_peak_102370 | 2.07                   | <0.01   | <0.01 | 21.30                  | <0.05   | 0.41  |
| ANKRD20A18P | ENST00000359341 | 15436645  | 15436848  | diffreps_peak_275299 | 3.57                   | <0.01   | <0.01 | 2.02                   | <0.05   | 0.26  |
| DGKZP1      | ENST00000378718 | 44542559  | 44542840  | diffreps_peak_118724 | 3.74                   | <0.01   | <0.01 | 7.43                   | <0.05   | 0.28  |
| PSG6        | ENST00000402456 | 43414061  | 43414700  | diffreps_peak_217953 | 7.56                   | <0.01   | <0.01 | 2.89                   | <0.01   | <0.01 |
| CICP5       | ENST00000424045 | 224137222 | 224137516 | diffreps_peak_39040  | 2.58                   | <0.01   | <0.01 | 2.53                   | <0.01   | <0.01 |
| CICP7       | ENST00000432723 | 330621    | 331120    | diffreps_peak_120    | 2.08                   | <0.01   | <0.01 | 2.41                   | <0.01   | 0.01  |
| OFD1P17     | ENST00000437639 | 37211381  | 37211760  | diffreps_peak_360031 | 11.98                  | <0.01   | <0.01 | 3.07                   | <0.01   | 0.02  |
| CICP3       | ENST00000440782 | 658601    | 659740    | diffreps_peak_215    | 6.16                   | <0.01   | <0.01 | 2.44                   | <0.01   | <0.01 |
| CICP4       | ENST00000447359 | 62923621  | 62924120  | diffreps_peak_274438 | 15.39                  | <0.01   | <0.01 | 26.20                  | <0.05   | 0.30  |
| LINC00319   | ENST00000448049 | 44866521  | 44866720  | diffreps_peak_279060 | 2.82                   | <0.01   | <0.01 | 20.80                  | <0.05   | 0.42  |
| AC068580.6  | ENST00000449248 | 1783521   | 1783716   | diffreps_peak_65797  | 2.88                   | <0.01   | <0.01 | 21.30                  | <0.05   | 0.41  |
| MPRIIP1     | ENST00000452433 | 44621429  | 44622060  | diffreps_peak_296026 | 2.07                   | <0.01   | <0.01 | 2.76                   | <0.01   | <0.01 |
| TXNDC5      | ENST00000460138 | 7889161   | 7889380   | diffreps_peak_388886 | 3.26                   | <0.01   | <0.01 | 5.84                   | <0.01   | <0.01 |
| AXIN1       | ENST00000461023 | 340721    | 341040    | diffreps_peak_160163 | 2.27                   | <0.01   | <0.01 | 63.00                  | <0.01   | 0.02  |
| APP         | ENST00000464867 | 27270061  | 27270260  | diffreps_peak_276338 | 2.10                   | <0.01   | <0.01 | 3.79                   | <0.01   | <0.01 |
| KLHL29      | ENST00000471654 | 23912301  | 23912520  | diffreps_peak_227000 | 3.16                   | <0.01   | <0.01 | 3.58                   | <0.05   | 0.20  |
| LPCAT1      | ENST00000475622 | 1457861   | 1458160   | diffreps_peak_354996 | 8.40                   | <0.01   | <0.01 | 27.20                  | <0.05   | 0.30  |
| MAMDC4      | ENST00000479475 | 139754161 | 139754440 | diffreps_peak_494424 | 2.22                   | <0.01   | <0.01 | 46.50                  | <0.01   | 0.04  |
| TNK2        | ENST00000481865 | 195612521 | 195612780 | diffreps_peak_322135 | 2.45                   | <0.01   | <0.01 | 31.50                  | <0.05   | 0.18  |
| RXRA        | ENST00000484822 | 137295601 | 137295980 | diffreps_peak_493599 | 2.02                   | <0.01   | <0.01 | 21.30                  | <0.05   | 0.41  |
| EML3        | ENST00000494448 | 62379701  | 62379853  | diffreps_peak_76640  | 4.03                   | <0.01   | <0.01 | 5.74                   | <0.01   | 0.09  |

|                |                 |           |           |                      |        |       |       |       |       |       |
|----------------|-----------------|-----------|-----------|----------------------|--------|-------|-------|-------|-------|-------|
| TMEM110-MUSTN1 | ENST00000495552 | 52869821  | 52870300  | diffreps_peak_298676 | 13.89  | <0.01 | <0.01 | 2.28  | <0.05 | 0.30  |
| RMND5B         | ENST00000507937 | 177572970 | 177573140 | diffreps_peak_385998 | 2.00   | <0.01 | <0.01 | 2.98  | <0.01 | 0.02  |
| ST3GAL1        | ENST00000519435 | 134582561 | 134582622 | diffreps_peak_467677 | 6.12   | <0.01 | <0.01 | 2.15  | <0.01 | <0.01 |
| RP11-219B4.3   | ENST00000520129 | 86089941  | 86090033  | diffreps_peak_459537 | 3.23   | <0.01 | <0.01 | 2.01  | <0.01 | 0.04  |
| PIDD           | ENST00000527357 | 801481    | 801720    | diffreps_peak_65535  | 2.24   | <0.01 | <0.01 | 3.74  | <0.05 | 0.23  |
| NADSYN1        | ENST00000527538 | 71170720  | 71170860  | diffreps_peak_79848  | 9.78   | <0.01 | <0.01 | 2.73  | <0.01 | <0.01 |
| C12orf60       | ENST00000527783 | 15058121  | 15058320  | diffreps_peak_94165  | 116.50 | <0.01 | <0.01 | 21.30 | <0.05 | 0.41  |
| EFEMP2         | ENST00000533347 | 65640153  | 65640413  | diffreps_peak_78064  | 2.32   | <0.01 | <0.01 | 3.95  | <0.05 | 0.22  |
| MC1R           | ENST00000539976 | 89978526  | 89978580  | diffreps_peak_176803 | 2.84   | <0.01 | <0.01 | 7.47  | <0.01 | <0.01 |
| METTL3         | ENST00000545788 | 21978801  | 21979122  | diffreps_peak_127854 | 2.20   | <0.01 | <0.01 | 2.87  | <0.01 | <0.01 |
| RELT           | ENST00000545886 | 73103961  | 73104360  | diffreps_peak_80427  | 2.65   | <0.01 | <0.01 | 2.77  | <0.01 | 0.03  |
| RP11-424I19.2  | ENST00000557903 | 101710754 | 101710880 | diffreps_peak_159730 | 2.60   | <0.01 | <0.01 | 6.65  | <0.01 | 0.04  |
| RP11-505K9.3   | ENST00000563242 | 84154694  | 84154700  | diffreps_peak_174279 | 117.50 | <0.01 | <0.01 | 3.11  | <0.05 | 0.24  |
| AC004449.6     | ENST00000564240 | 637104    | 637537    | diffreps_peak_206073 | 2.73   | <0.01 | <0.01 | 2.78  | <0.01 | 0.00  |
| RP11-95P2.3    | ENST00000573220 | 4230117   | 4230140   | diffreps_peak_162727 | 5.54   | <0.01 | <0.01 | 42.70 | <0.01 | 0.10  |
| ZZEF1          | ENST00000573606 | 3936341   | 3936560   | diffreps_peak_178399 | 2.52   | <0.01 | <0.01 | 6.30  | <0.01 | 0.10  |
| TFAP4          | ENST00000575320 | 4315761   | 4315980   | diffreps_peak_162752 | 2.86   | <0.01 | <0.01 | 30.50 | <0.05 | 0.21  |
| MNT            | ENST00000575402 | 2293301   | 2293640   | diffreps_peak_177892 | 8.06   | <0.01 | <0.01 | 2.30  | <0.01 | 0.16  |
| KCTD1          | ENST00000577255 | 24036821  | 24037120  | diffreps_peak_198643 | 6.39   | <0.01 | <0.01 | 25.60 | <0.05 | 0.33  |
| RP11-573D15.9  | ENST00000577781 | 186500281 | 186501040 | diffreps_peak_320785 | 7.20   | <0.01 | <0.01 | 5.13  | <0.01 | <0.01 |
| TP53I13        | ENST00000579674 | 27899701  | 27900174  | diffreps_peak_182886 | 3.86   | <0.01 | <0.01 | 2.66  | <0.01 | 0.02  |
| GRIN2C         | ENST00000584176 | 72842898  | 72843400  | diffreps_peak_191511 | 109.30 | <0.01 | <0.01 | 2.87  | <0.01 | 0.14  |
| PRKACA         | ENST00000587533 | 14207182  | 14207540  | diffreps_peak_211228 | 4.00   | <0.01 | <0.01 | 4.86  | <0.01 | 0.02  |
| TBC1D3G        | ENST00000587756 | 34801441  | 34801605  | diffreps_peak_184224 | 2.96   | <0.01 | <0.01 | 26.20 | <0.05 | 0.30  |
| THOP1          | ENST00000589087 | 2807961   | 2808240   | diffreps_peak_207272 | 2.17   | <0.01 | <0.01 | 2.75  | <0.05 | 0.30  |
| FGF22          | ENST00000591390 | 640001    | 640900    | diffreps_peak_206081 | 229.60 | <0.01 | <0.01 | 8.09  | <0.01 | <0.01 |



|               |                 |           |           |                      |        |       |       |       |        |       |
|---------------|-----------------|-----------|-----------|----------------------|--------|-------|-------|-------|--------|-------|
| PNPLA6        | ENST00000594754 | 7599635   | 7600260   | diffreps_peak_208990 | 2.01   | <0.01 | <0.01 | 2.19  | <0.01  | <0.01 |
| JOSD2         | ENST00000595718 | 51013396  | 51013540  | diffreps_peak_221082 | 2.85   | <0.01 | <0.01 | 61.00 | <0.01  | 0.02  |
| GS1-393G12.14 | ENST00000607491 | 145635021 | 145635360 | diffreps_peak_469871 | 5.82   | <0.01 | <0.01 | 2.70  | <0.01  | 0.17  |
| MYH16         | NR_002147       | 98885514  | 98885760  | diffreps_peak_434907 | 5.00   | <0.01 | <0.01 | 3.46  | <0.01  | 0.05  |
| SNHG7         | NR_003672       | 139622621 | 139622636 | diffreps_peak_494315 | 2.60   | <0.01 | <0.01 | 3.49  | <0.01  | 0.11  |
| PLEKHM1P      | NR_024386       | 62781001  | 62781240  | diffreps_peak_190180 | 2.80   | <0.01 | <0.01 | 8.40  | <0.01  | <0.01 |
| KTN1-AS1      | NR_027123       | 56043381  | 56043980  | diffreps_peak_134695 | 3.94   | <0.01 | <0.01 | 2.71  | <0.01  | 0.01  |
| TRAF3IP2-AS1  | NR_034108       | 111920341 | 111920560 | diffreps_peak_407742 | 2.06   | <0.01 | <0.01 | 7.52  | <0.05  | 0.28  |
| PTOV1-AS1     | NR_040037       | 50347572  | 50347880  | diffreps_peak_220846 | 8.27   | <0.01 | <0.01 | 6.55  | <0.001 | 0.03  |
| RNASEH2B-AS1  | NR_046552       | 51484618  | 51484848  | diffreps_peak_120029 | 103.80 | <0.01 | <0.01 | 3.45  | <0.05  | 0.22  |
| TONSL-AS1     | NR_109770       | 145664858 | 145665040 | diffreps_peak_469913 | 2.18   | <0.01 | <0.01 | 3.94  | <0.05  | 0.18  |
| LOC101928034  | NR_125947       | 153523718 | 153524080 | diffreps_peak_27145  | 4.61   | <0.01 | <0.01 | 2.91  | <0.05  | 0.40  |
| AK128439      | uc002ezo.1      | 70723141  | 70723460  | diffreps_peak_172397 | 3.25   | <0.01 | <0.01 | 2.85  | <0.01  | <0.01 |
| BC037357      | uc002goo.3      | 15332289  | 15332340  | diffreps_peak_180377 | 2.77   | <0.01 | <0.01 | 3.31  | <0.01  | 0.15  |
| AX747521      | uc002jrt.3      | 74493021  | 74493240  | diffreps_peak_192120 | 3.74   | <0.01 | <0.01 | 26.20 | <0.05  | 0.30  |
| RP11-392P7.6  | ENST00000538231 | 13101128  | 13101420  | diffreps_peak_93904  | 16.39  | <0.01 | <0.01 | 47.00 | <0.01  | 0.04  |
| DNM1P47       | ENST00000561463 | 102303281 | 102303660 | diffreps_peak_159935 | 2.16   | <0.01 | <0.01 | 35.80 | <0.01  | 0.15  |
| SLC27A5       | ENST00000593745 | 59021881  | 59022280  | diffreps_peak_223900 | 12.28  | <0.01 | <0.01 | 21.30 | <0.05  | 0.41  |
| RP4-758J18.13 | ENST00000607307 | 1344521   | 1344820   | diffreps_peak_760    | 2.97   | <0.01 | <0.01 | 3.50  | <0.05  | 0.26  |

Differentially methylated RNA sites for Case vs Control; Fold change cut-off: 2; P-value cut-off: 0.01; FDR: the corrected p-value between two groups; Regulation: up or down in test group; Transcript id: the unique identifier describing the predicted lncRNA assigned by stringtie; Gene Name: the gene id assigned by stringtie

**A****Lenti-METTL3 Vector**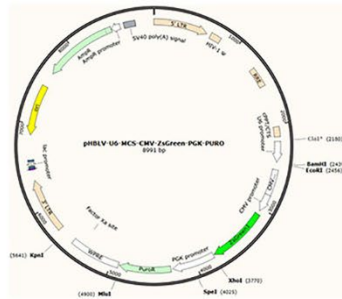**B**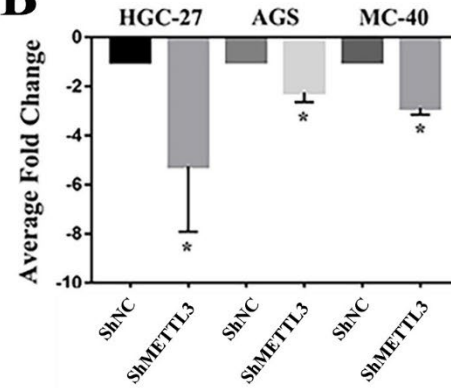**C**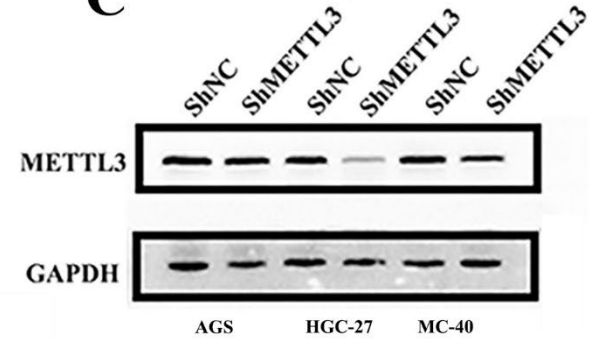

**Supplementary Figure 1 Knock-down of METTL3 in MC and GC cells.** (A) Lentiviral vectors stably knocking down METTL3 were infected with MC and GC cells. (B) qRT-PCR detected the transfected efficiency, \* $P < 0.05$ . (C) Western Blot analysis confirmed the transfected efficiency.

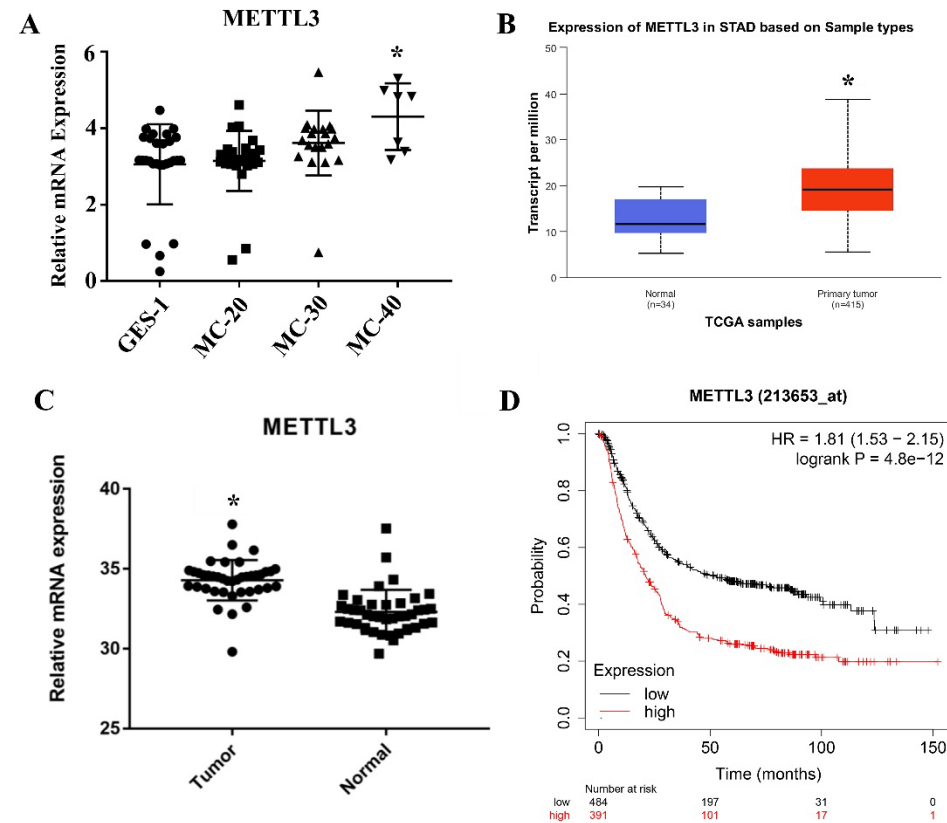

**Supplementary Figure 2** METTL3 expression in GC cells and patients. A. METTL3 mRNA expression levels in MC cells, \* $P < 0.05$ ; B. METTL3 mRNA expression levels in TCGA STAD cohort, \* $P < 0.05$ ; C. METTL3 mRNA expression levels in GC tissue samples, \* $P < 0.05$ ; D. The Kaplan–Meier estimates survival time in two groups of patients from the GEO GC cohort by different METTL3 expression levels.
